# Supplementary material for: Development of fluorometric detection for saxitoxin with its specific binding peptide
Source: Royal Society of Chemistry journal article supplement (doi:10.1039/d3sd00295k), 2023-12-23
Supplement: d3sd00295k1.pdf [file d3sd00295k1.pdf]

**Table S1** The recovery test of STX in CRM sample

| <b>STX concentration</b> | <b>Assayed (ppb)</b>                  | <b>Recovery (%)</b> |
|--------------------------|---------------------------------------|---------------------|
| <b>in CRM (ppb)</b>      | <b>Mean <math>\pm</math> SD (n=3)</b> |                     |
| 100                      | 92.9 $\pm$ 0.007 (CV=1.9%)            | 92.9                |
| 200                      | 203.8 $\pm$ 0.009 (CV=2.1%)           | 101.9               |
| 400                      | 408.6 $\pm$ 0.019 (CV=4.0%)           | 102.1               |
